# Supplementary material for: Endothelial Cells' Activation and Apoptosis Induced by a Subset of Antibodies against Human Cytomegalovirus: Relevance to the Pathogenesis of Atherosclerosis
Source: PLoS One. 2007 May 30;2(5):e473. doi: 10.1371/journal.pone.0000473 (PMC1868596; doi:10.1371/journal.pone.0000473)
Supplement: Table S3 — Genes up-regulated by anti-UL122 antibodies. (0.04 MB XLS) [file pone.0000473.s004.xls]

## Sheet: H122 UP functions 27.07
Table S3: Genes up-regulated by anti-UL122 antibodies.
Probe Set ID	Gene access number	F.C UL122 6h	F.C UL122 12h	Gene description	Gene Symbol
206211_at	NM_000450.1	31.1583	15.0443	selectin E (endothelial adhesion molecule 1)	SELE
216598_s_at	S69738.1	19.6538	16.6252	chemokine (C-C motif) ligand 2	CCL2
203868_s_at	NM_001078.1	18.8725	6.1172	vascular cell adhesion molecule 1	VCAM1
202638_s_at	NM_000201.1	12.7527	7.26035	intercellular adhesion molecule 1 (CD54), human rhinovirus receptor	ICAM1
207850_at	NM_002090.1	10.7902	6.15174	chemokine (C-X-C motif) ligand 3	CXCL3
209774_x_at	M57731.1	9.56381	6.8364	chemokine (C-X-C motif) ligand 2	CXCL2
202637_s_at	AI608725	8.33414	5.60385	intercellular adhesion molecule 1 (CD54), human rhinovirus receptor	ICAM1
205476_at	NM_004591.1	7.59834	4.78946	chemokine (C-C motif) ligand 20	CCL20
204470_at	NM_001511.1	6.26297	4.56406	chemokine (C-X-C motif) ligand 1 (melanoma growth stimulating activity, alpha)	CXCL1
209795_at	L07555.1	6.09565	3.70031	CD69 antigen (p60, early T-cell activation antigen)	CD69
211122_s_at	AF002985.1	5.55394	6.04887	chemokine (C-X-C motif) ligand 11	CXCL11
221477_s_at	BF575213	5.50558	4.665	superoxide dismutase 2, mitochondrial	SOD2
209785_s_at	AF065214.1	5.12087	10.8474	phospholipase A2, group IVC (cytosolic, calcium-independent)	PLA2G4C
210163_at	AF030514.1	4.63124	4.67013	chemokine (C-X-C motif) ligand 11	CXCL11
219209_at	NM_022168.1	4.32838	4.17689	melanoma differentiation associated protein-5	MDA5
211506_s_at	AF043337.1	3.70156	2.88898
218541_s_at	NM_020130.1	3.59543	2.42459	chromosome 8 open reading frame 4	C8orf4
204567_s_at	NM_004915.2	3.11956	2.85562	ATP-binding cassette, sub-family G (WHITE), member 1	ABCG1
823_at	U84487	3.11327	2.97853	chemokine (C-X3-C motif) ligand 1	CX3CL1
215223_s_at	W46388	3.03819	5.3767	superoxide dismutase 2, mitochondrial	SOD2
202859_x_at	NM_000584.1	2.80377	2.38899	interleukin 8	IL8
205890_s_at	NM_006398.1	2.72212	3.85118	ubiquitin D	UBD
202643_s_at	AI738896	2.70987	2.44141	tumor necrosis factor, alpha-induced protein 3	TNFAIP3
201502_s_at	AI078167	2.69916	2.26916	nuclear factor of kappa light polypeptide gene enhancer in B-cells inhibitor, alpha	NFKBIA
202644_s_at	NM_006290.1	2.66504	1.89517	tumor necrosis factor, alpha-induced protein 3	TNFAIP3
220116_at	NM_021614.1	2.56624	2.65056	potassium intermediate/small conductance calcium-activated channel, subfamily N, member 2	KCNN2
212977_at	AI817041	2.52267	1.59816	G protein-coupled receptor	RDC1
216841_s_at	X15132.1	2.45318	4.59955	superoxide dismutase 2, mitochondrial	SOD2
221087_s_at	NM_014349.1	2.40309	1.71483	apolipoprotein L, 3	APOL3
202510_s_at	NM_006291.1	2.3769	1.57756	tumor necrosis factor, alpha-induced protein 2	TNFAIP2
202688_at	NM_003810.1	2.37279	3.39154	tumor necrosis factor (ligand) superfamily, member 10	TNFSF10
205051_s_at	NM_000222.1	2.31348	2.24174	v-kit Hardy-Zuckerman 4 feline sarcoma viral oncogene homolog	KIT
205047_s_at	NM_001673.1	2.30116	3.23214	asparagine synthetase	ASNS
211113_s_at	U34919.1	2.22112	2.01131	ATP-binding cassette, sub-family G (WHITE), member 1	ABCG1
202687_s_at	U57059.1	2.20557	3.15216	tumor necrosis factor (ligand) superfamily, member 10	TNFSF10
203973_s_at	NM_005195.1	2.20209	2.43247	KIAA0146 protein	KIAA0146
202023_at	NM_004428.1	2.11673	1.85667	ephrin-A1	EFNA1
203927_at	NM_004556.1	2.07444	1.86646	nuclear factor of kappa light polypeptide gene enhancer in B-cells inhibitor, epsilon	NFKBIE
206336_at	NM_002993.1	2.05943	1.83107	chemokine (C-X-C motif) ligand 6 (granulocyte chemotactic protein 2)	CXCL6
206618_at	NM_003855.1	2.02578	1.30947	interleukin 18 receptor 1	IL18R1
203687_at	NM_002996.1	2.00746	1.47724	chemokine (C-X3-C motif) ligand 1	CX3CL1
205205_at	NM_006509.1	1.99874	1.99631	v-rel reticuloendotheliosis viral oncogene homolog B, nuclear factor of kappa light polypeptide gene enhancer in B-cells 3 (avian)	RELB
204404_at	NM_001046.1	1.98997	2.58226	solute carrier family 12 (sodium/potassium/chloride transporters), member 2	SLC12A2
216060_s_at	AK021890.1	1.97358	1.37736	dishevelled associated activator of morphogenesis 1	DAAM1
205567_at	NM_003654.1	1.95732	2.47659	carbohydrate (keratan sulfate Gal-6) sulfotransferase 1	CHST1
204715_at	NM_015368.1	1.95553	1.41792	pannexin 1	PANX1
204748_at	NM_000963.1	1.94357	1.28082	prostaglandin-endoperoxide synthase 2 (prostaglandin G/H synthase and cyclooxygenase)	PTGS2
204512_at	NM_002114.1	1.93822	1.17676	human immunodeficiency virus type I enhancer binding protein 1	HIVEP1
214974_x_at	AK026546.1	1.88163	1.99701	chemokine (C-X-C motif) ligand 5	CXCL5
215485_s_at	AA284705	1.85394	1.72858	intercellular adhesion molecule 1 (CD54), human rhinovirus receptor	ICAM1
202269_x_at	BC002666.1	1.8429	1.69304	guanylate binding protein 1, interferon-inducible, 67kDa	GBP1
217028_at	AJ224869	1.83585	2.17889	chemokine (C-X-C motif) receptor 4	CXCR4
204285_s_at	AI857639	1.8341	1.68975	phorbol-12-myristate-13-acetate-induced protein 1	PMAIP1
205651_x_at	NM_007023.1	1.82955	1.07963	cAMP-regulated guanine nucleotide exchange factor II	CGEF2
204114_at	NM_007361.1	1.82901	2.94262	nidogen 2 (osteonidogen)	NID2
202307_s_at	NM_000593.2	1.82596	2.14805	transporter 1, ATP-binding cassette, sub-family B (MDR/TAP)	TAP1
218723_s_at	NM_014059.1	1.82466	1.35161	RGC32 protein	RGC32
210538_s_at	U37546.1	1.81675	1.32131	baculoviral IAP repeat-containing 3	BIRC3
202074_s_at	NM_021980.1	1.81136	1.8017	optineurin	OPTN
205932_s_at	NM_002448.1	1.80961	1.73586	msh homeo box homolog 1 (Drosophila)	MSX1
207196_s_at	NM_006058.1	1.80709	1.93896	TNFAIP3 interacting protein 1	TNIP1
212845_at	AB028976.1	1.79986	1.29584	KIAA1053 protein	KIAA1053
209348_s_at	AF055376.1	1.78554	1.04648	v-maf musculoaponeurotic fibrosarcoma oncogene homolog (avian)	MAF
217873_at	NM_016289.1	1.77673	1.49443	MO25 protein	MO25
209451_at	U59863.1	1.77154	1.38187	TRAF family member-associated NFKB activator	TANK
211981_at	NM_001845.1	1.77032	2.14874	collagen, type IV, alpha 1	COL4A1
201998_at	AI743792	1.76139	1.4633	sialyltransferase 1 (beta-galactoside alpha-2,6-sialyltransferase)	SIAT1
206429_at	NM_005242.2	1.75975	1.82563	coagulation factor II (thrombin) receptor-like 1	F2RL1
203823_at	NM_021106.1	1.75627	1.48237	regulator of G-protein signalling 3	RGS3
211980_at	NM_001845.1	1.75482	1.85165	collagen, type IV, alpha 1	COL4A1
36711_at	AL021977	1.73722	1.27495	v-maf musculoaponeurotic fibrosarcoma oncogene homolog F (avian)	MAFF
205680_at	NM_002425.1	1.73179	2.28247	matrix metalloproteinase 10 (stromelysin 2)	MMP10
212641_at	AL023584	1.72703	1.49248	human immunodeficiency virus type I enhancer binding protein 2	HIVEP2
213506_at	BE965369	1.72426	1.63352	coagulation factor II (thrombin) receptor-like 1	F2RL1
204286_s_at	NM_021127.1	1.72266	1.33911	phorbol-12-myristate-13-acetate-induced protein 1	PMAIP1
211964_at	AK025912.1	1.71349	1.88441	collagen, type IV, alpha 2	COL4A2
205193_at	NM_012323.1	1.69808	1.30031	v-maf musculoaponeurotic fibrosarcoma oncogene homolog F (avian)	MAFF
218943_s_at	NM_014314.1	1.69153	1.63849	DEAD/H (Asp-Glu-Ala-Asp/His) box polypeptide	RIG-I
33304_at	U88964	1.69117	2.27219	interferon stimulated gene 20kDa	ISG20
210056_at	U69563	1.68801	1.44296	GTP-binding protein	RHO6
209201_x_at	L01639.1	1.68722	2.27382	chemokine (C-X-C motif) receptor 4	CXCR4
207181_s_at	NM_001227.1	1.68653	1.35126	caspase 7, apoptosis-related cysteine protease	CASP7
203038_at	NM_002844.1	1.67973	1.26509	protein tyrosine phosphatase, receptor type, K	PTPRK
207339_s_at	NM_002341.1	1.67898	1.59803	lymphotoxin beta (TNF superfamily, member 3)	LTB
205992_s_at	NM_000585.1	1.67676	1.2309	interleukin 15	IL15
202599_s_at	NM_003489.1	1.66857	1.59569	nuclear receptor interacting protein 1	NRIP1
201207_at	NM_021137.1	1.66782	1.44528	tumor necrosis factor, alpha-induced protein 1 (endothelial)	TNFAIP1
43511_s_at	AI201594	1.66633	1.68619	Homo sapiens mRNA; cDNA DKFZp762M127 (from clone DKFZp762M127)
203828_s_at	NM_004221.1	1.66278	4.27962	natural killer cell transcript 4	NK4
204523_at	NM_003440.1	1.6578	1.30802	zinc finger protein 140 (clone pHZ-39)	ZNF140
211919_s_at	AF348491.1	1.6573	2.25212	chemokine (C-X-C motif) receptor 4	CXCR4
204698_at	NM_002201.2	1.65625	2.53556	interferon stimulated gene 20kDa	ISG20
214329_x_at	AW474434	1.6548	1.77574	tumor necrosis factor (ligand) superfamily, member 10	TNFSF10
211596_s_at	AB050468.1	1.65142	1.22209	leucine-rich repeats and immunoglobulin-like domains 1	LRIG1
207616_s_at	NM_004180.1	1.64748	1.41806	TRAF family member-associated NFKB activator	TANK
201471_s_at	NM_003900.1	1.64223	1.44629	sequestosome 1	SQSTM1
218421_at	NM_022766.1	1.64138	1.40163	ceramide kinase	CERK
202270_at	NM_002053.1	1.63413	1.21764	guanylate binding protein 1, interferon-inducible, 67kDa	GBP1
211197_s_at	AL355690.1	1.63149	1.46091	B7-like protein	B7H2
217591_at	BF725121	1.62585	1.10936	SKI-like	SKIL
221571_at	AI721219	1.60816	1.45367	TNF receptor-associated factor 3	TRAF3
213891_s_at	AI927067	1.60739	1.48135	transcription factor 4	TCF4
205599_at	NM_005658.1	1.60136	1.39019	TNF receptor-associated factor 1	TRAF1
212642_s_at	AL023584	1.60091	1.42158	human immunodeficiency virus type I enhancer binding protein 2	HIVEP2
205579_at	NM_000861.2	1.60021	1.26017	histamine receptor H1	HRH1
218810_at	NM_025079.1	1.59644	1.33256	hypothetical protein FLJ23231	FLJ23231
AFFX-r2-Hs28SrRNA-3_at	M11167	1.59615	1.21967
202727_s_at	NM_000416.1	1.59357	1.66132	interferon gamma receptor 1	IFNGR1
204352_at	NM_004619.1	1.58834	1.97677	TNF receptor-associated factor 5	TRAF5
203502_at	NM_001724.1	1.58225	1.14713	2,3-bisphosphoglycerate mutase	BPGM
202073_at	AV757675	1.57924	1.60649	optineurin	OPTN
205027_s_at	NM_005204.1	1.57881	1.31376	mitogen-activated protein kinase kinase kinase 8	MAP3K8
220091_at	NM_017585.2	1.57722	1.32698	solute carrier family 2 (facilitated glucose transporter), member 6	SLC2A6
209907_s_at	AF182198.1	1.57609	1.42469	intersectin 2	ITSN2
211966_at	AK025912.1	1.57341	2.46094	collagen, type IV, alpha 2	COL4A2
202720_at	NM_015641.1	1.56496	1.35601	testis derived transcript (3 LIM domains)	TES
205159_at	AV756141	1.56402	1.24461	colony stimulating factor 2 receptor, beta, low-affinity (granulocyte-macrophage)	CSF2RB
211676_s_at	AF056979.1	1.55936	1.87523	interferon gamma receptor 1	IFNGR1
202597_at	AU144284	1.55616	1.25345	interferon regulatory factor 6	IRF6
201761_at	NM_006636.2	1.54843	1.20789	methylene tetrahydrofolate dehydrogenase (NAD+ dependent), methenyltetrahydrofolate cyclohydrolase	MTHFD2
208078_s_at	NM_030751.1	1.54834	1.14971	transcription factor 8 (represses interleukin 2 expression)	TCF8
212810_s_at	BG032165	1.54782	1.3141	solute carrier family 1 (glutamate/neutral amino acid transporter), member 4	SLC1A4
201642_at	NM_005534.1	1.54557	1.35624	interferon gamma receptor 2 (interferon gamma transducer 1)	IFNGR2
207220_at	NM_021071.1	1.54535	1.21749	Dombrock blood group	DO
202351_at	AI093579	1.54493	1.33312	integrin, alpha V (vitronectin receptor, alpha polypeptide, antigen CD51)	ITGAV
219761_at	NM_016511.1	1.54429	1.72469	C-type lectin-like receptor-1	CLEC1
202770_s_at	NM_004354.1	1.54211	1.43247	cyclin G2	CCNG2
205238_at	NM_024917.1	1.53604	1.25928	hypothetical protein FLJ12687	FLJ12687
201236_s_at	NM_006763.1	1.53231	1.55619	BTG family, member 2	BTG2
218177_at	AA293502	1.53145	1.19793	CHMP1.5 protein	CHMP1.5
202071_at	NM_002999.1	1.51934	1.36537	syndecan 4 (amphiglycan, ryudocan)	SDC4
202149_at	AL136139	1.51759	1.16065	neural precursor cell expressed, developmentally down-regulated 9	NEDD9
205379_at	NM_001236.2	1.51697	1.30755	carbonyl reductase 3	CBR3
210809_s_at	D13665.1	1.51642	1.01836	osteoblast specific factor 2 (fasciclin I-like)	OSF-2
207691_x_at	NM_001776.1	1.51609	1.24626	ectonucleoside triphosphate diphosphohydrolase 1	ENTPD1
202267_at	NM_005562.1	1.51179	2.40589	laminin, gamma 2	LAMC2
221019_s_at	NM_030781.1	1.49401	1.85466	collectin sub-family member 12	COLEC12
220111_s_at	NM_020373.1	1.49394	1.72805	chromosome 12 open reading frame 3	C12orf3
207626_s_at	NM_003046.1	1.47721	1.53347	solute carrier family 7 (cationic amino acid transporter, y+ system), member 2	SLC7A2
201034_at	BE545756	1.46594	1.8343	adducin 3 (gamma)	ADD3
205801_s_at	NM_015376.1	1.46142	1.88433	RAS guanyl releasing protein 3 (calcium and DAG-regulated)	RASGRP3
204030_s_at	NM_014575.1	1.46074	1.54791	schwannomin interacting protein 1	SCHIP1
204396_s_at	NM_005308.1	1.45163	1.72096	G protein-coupled receptor kinase 5	GPRK5
215813_s_at	S36219.1	1.4472	1.56032	prostaglandin-endoperoxide synthase 1 (prostaglandin G/H synthase and cyclooxygenase)	PTGS1
204341_at	NM_006470.1	1.4324	1.76526	tripartite motif-containing 16	TRIM16
221861_at	AL157484.1	1.4163	1.55324	Homo sapiens mRNA; cDNA DKFZp762M127 (from clone DKFZp762M127)
222033_s_at	AA058828	1.40893	1.55519	fms-related tyrosine kinase 1 (vascular endothelial growth factor/vascular permeability factor receptor)	FLT1
221725_at	NM_006990.1	1.40705	1.63799	WAS protein family, member 2	WASF2
220300_at	NM_017790.1	1.40437	1.55771	regulator of G-protein signalling 3	RGS3
202088_at	AI635449	1.38973	1.56858	LIV-1 protein, estrogen regulated	LIV-1
209098_s_at	U61276.1	1.37604	1.75667	jagged 1 (Alagille syndrome)	JAG1
203414_at	NM_012329.1	1.36694	1.55874	monocyte to macrophage differentiation-associated	MMD
204040_at	NM_014746.1	1.35915	1.79969	ring finger protein 144	RNF144
203723_at	NM_002221.1	1.35275	1.85966	inositol 1,4,5-trisphosphate 3-kinase B	ITPKB
209582_s_at	H23979	1.34247	2.01383	antigen identified by monoclonal antibody MRC OX-2	MOX2
203947_at	NM_001326.1	1.32949	1.53216	cleavage stimulation factor, 3' pre-RNA, subunit 3, 77kDa	CSTF3
219506_at	NM_024579.1	1.32064	1.75725	hypothetical protein FLJ23221	FLJ23221
219202_at	NM_024599.1	1.31651	1.65632	hypothetical protein FLJ22341	FLJ22341
203185_at	NM_014737.1	1.31318	1.73009	Ras association (RalGDS/AF-6) domain family 2	RASSF2
213392_at	AW070229	1.31103	1.57553	Homo sapiens transcribed sequence with strong similarity to protein ref:NP_002112.2 (H.sapiens) major histocompatibility complex, class II, DP beta 1 precursor; HLA class II histocompatibility antigen, DP chain; HLA-DP HISTOCOMPATIBILITY type, beta-1 subunit [Homo sapiens]
215118_s_at	AW519168	1.30926	1.55056	hypothetical protein MGC27165	MGC27165
202847_at	NM_004563.1	1.3079	1.98243	phosphoenolpyruvate carboxykinase 2 (mitochondrial)	PCK2
216268_s_at	U77914.1	1.29716	1.57191	jagged 1 (Alagille syndrome)	JAG1
220892_s_at	NM_021154.1	1.297	2.3028	phosphoserine aminotransferase 1	PSAT1
203940_s_at	NM_014909.1	1.27144	1.65353	KIAA1036 protein	KIAA1036
212950_at	AB018301.1	1.26519	2.18405	G protein-coupled receptor 116	GPR116
219962_at	NM_021804.1	1.26428	1.55699	angiotensin I converting enzyme (peptidyl-dipeptidase A) 2	ACE2
201329_s_at	NM_005239.1	1.26085	1.53175	v-ets erythroblastosis virus E26 oncogene homolog 2 (avian)	ETS2
212364_at	AK000160.1	1.25293	2.49207	myosin IB	MYO1B
201746_at	NM_000546.2	1.25237	1.70755	tumor protein p53 (Li-Fraumeni syndrome)	TP53
209583_s_at	AF063591.1	1.24903	1.85309	antigen identified by monoclonal antibody MRC OX-2	MOX2
221610_s_at	BC000795.1	1.23882	1.5165	signal-transducing adaptor protein-2	STAP2
214058_at	M19720	1.23562	1.74716	v-myc myelocytomatosis viral oncogene homolog 1, lung carcinoma derived (avian)	MYCL1
209652_s_at	BC001422.1	1.23378	1.55547	placental growth factor, vascular endothelial growth factor-related protein	PGF
206633_at	NM_000079.1	1.22903	1.62884	cholinergic receptor, nicotinic, alpha polypeptide 1 (muscle)	CHRNA1
200904_at	X56841.1	1.22231	1.52332	major histocompatibility complex, class I, E	HLA-E
202902_s_at	NM_004079.1	1.22137	1.58841	cathepsin S	CTSS
219656_at	NM_016580.1	1.21739	2.08942	protocadherin 12	PCDH12
203934_at	NM_002253.1	1.2126	1.52114	kinase insert domain receptor (a type III receptor tyrosine kinase)	KDR
209015_s_at	BC002446.1	1.18708	1.63298	DnaJ (Hsp40) homolog, subfamily B, member 6	DNAJB6
209183_s_at	AL136653.1	1.18658	1.75858	decidual protein induced by progesterone	DEPP
204482_at	NM_003277.1	1.17538	1.70914	claudin 5 (transmembrane protein deleted in velocardiofacial syndrome)	CLDN5
203685_at	NM_000633.1	1.13411	1.52105	B-cell CLL/lymphoma 2	BCL2
212951_at	AB018301.1	1.11983	1.79967	G protein-coupled receptor 116	GPR116
209086_x_at	BE964361	1.07905	1.52716	melanoma cell adhesion molecule	MCAM
212365_at	AK000160.1	1.07637	1.84928	myosin IB	MYO1B
