# Supplementary material for: Endothelial Cells' Activation and Apoptosis Induced by a Subset of Antibodies against Human Cytomegalovirus: Relevance to the Pathogenesis of Atherosclerosis
Source: PLoS One. 2007 May 30;2(5):e473. doi: 10.1371/journal.pone.0000473 (PMC1868596; doi:10.1371/journal.pone.0000473)
Supplement: Table S6 — Genes down-regulated by both anti-US28 and anti-UL122 antibodies. (0.01 MB XLS) [file pone.0000473.s007.xls]

## Sheet: Foglio1
Table S6: Down regulated genes by both anti-US28 and anti-UL122 antibodies.
Gene access number	Gene Symbol	Gene description					US28 F.C.	US28 F.C.	UL122 F.C.	UL122 F.C
NM_000786.2	CYP51A1	cytochrome P450, family 51, subfamily A, polypeptide 1					-1.45706	-2.59874	-1.34542	-1.53427
NM_012242.2	DKK1	dickkopf homolog 1 (Xenopus laevis)					-1.49984	-2.00051	-1.13449	-1.75198
NM_004447.4	EPS8	epidermal growth factor receptor pathway substrate 8					-1.03494	-1.81401	-1.16628	-1.53535
BC005147.2	FKBP1A	FK506 binding protein 1A, 12kDa					-1.97775	-1.54708	-1.54988	-1.09514
NM_000859.1	HMGCR	3-hydroxy-3-methylglutaryl-Coenzyme A reductase					-1.03157	-1.8232	-1.32271	-1.86362
BC005247.2	IDI1	isopentenyl-diphosphate delta isomerase					-1.45421	-1.90731	-1.50849	-1.73041
M31159.1	IGFBP3	insulin-like growth factor binding protein 3					-1.38822	-1.69214	-1.30649	-1.92382
NM_005542.3	INSIG1	insulin induced gene 1					-3.21417	-4.38986	-2.03976	-2.23961
BE881529	LARP1	likely ortholog of mouse la related protein					-1.7	-1.5	-1.5	-1.2
NM_000527.2	LDLR	low density lipoprotein receptor (familial hypercholesterolemia)					-1.64557	-2.56249	-1.71779	-2.01132
NM_004808.1	NMT2	N-myristoyltransferase 2					-1.91934	-1.91934	-1.15205	-1.55857
NM_000603.3	NOS3	nitric oxide synthase 3 (endothelial cell)					-1.656	-1.48919	-1.53142	-1.19659
U41815.1	NUP98	nucleoporin 98kDa					-1.21747	-2.01647	-1.04788	-1.83872
NM_002589.2	PCDH7	BH-protocadherin (brain-heart)					-2.21112	-3.10003	-1.88169	-2.86661
NM_002654.3	PKM2	pyruvate kinase, muscle					-1.74447	-1.57369	-1.68155	-1.25626
BC005961.1	PTHLH	parathyroid hormone-like hormone					-1.29777	-1.79973	-1.32693	-2.04637
NM_005613.3	RGS4	regulator of G-protein signalling 4					-2.34591	-1.67887	-1.88763	-1.62343
AI692974	RRM1	ribonucleotide reductase M1 polypeptide					-1.6	-1.1	-1.3	-1.6
NM_006745.3	SC4MOL	sterol-C4-methyl oxidase-like					-1.10457	-1.71295	-1.63521	-2.21361
NM_005063.4	SCD	stearoyl-CoA desaturase (delta-9-desaturase)					-2.11268	-1.73458	-1.51808	-1.542
NM_002998.3	SDC2	syndecan 2 (heparan sulfate proteoglycan 1, cell surface-associated, fibroglycan)					-1.61148	-1.41427	-1.2094	-1.51728
AF098865.1	SQLE	squalene epoxidase					-3.31405	-3.52928	-1.35739	-1.74709
NM_000361.2	THBD	thrombomodulin					-1.10052	-1.87861	-1.66857	-1.54801
NM_014729.2	TOX	thymus high mobility group box protein TOX					-1.74376	-2.04138	-1.40055	-1.54134
U28936.1	YWHAE	tyrosine 3-monooxygenase/tryptophan 5-monooxygenase activation protein, epsilon polypeptide					-6.75448	-2.22547	-2.6418	-1.29013
